# Supplementary material
Source: PubMed Central journal article supplement (PMC4687785)

### Source data Figure 5A

Cortical extracts (CTX)

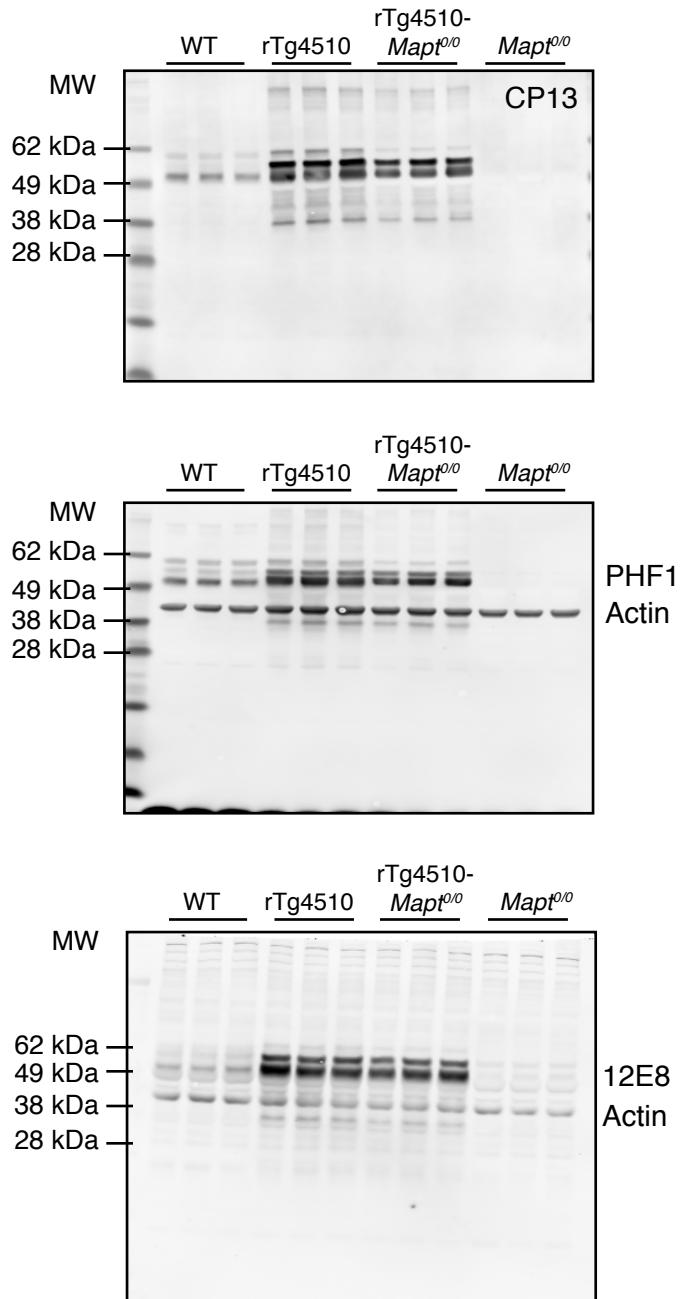

Supplement: EMBJ-34-3028-s004.pdf [file EMBJ-34-3028-s004.pdf]
